# Supplementary material for: Enzymes Involved in Antioxidant and Detoxification Processes Present Changes in the Expression Levels of Their Coding Genes under the Stress Caused by the Presence of Antimony in Tomato
Source: MDPI journal article supplement (doi:10.3390/plants13050609), 2024-02-23
Supplement: s1 [file s1]

**Supplementary Materials:**

**Supplementary Table S1.** The Sb content of roots and leaves and the corresponding bioaccumulation factor (BF) and translocation factor (TF) values in tomato plants. A total of 15 plants were analysed for each treatment with three biological replicates.

| Sample    | Roots         | Shoots     | TF    |
|-----------|---------------|------------|-------|
| Control   | 4.7±0.8       | nd         | nd    |
| 0.5 mM Sb | 10832.4±460.5 | 336.7±26.7 | 0.033 |
| 1.0 mM Sb | 13066.5±390.4 | 564.7±51.2 | 0.041 |

**Supplementary Table S2.** Primers used for synthesis of tomato cDNAs.

| Gene                   | ID Gene            | Primers (5'-3')         | Size (pb) |
|------------------------|--------------------|-------------------------|-----------|
| <i>Actin</i>           | Solyc04g011500.2.1 | GAAATAGCATAAGATGGCAGACG | 159       |
|                        |                    | ATACCCACCATCACACCAGTAT  |           |
| <i>β-tubulin (TUB)</i> | Solyc04g081490.2.1 | AACCTCCATTTCAGGAGATGTTT | 180       |
|                        |                    | TCTGCTGTAGCATCCTGGTATT  |           |
| <i>APX</i>             | Solyc06g005150.3   | TCTGGTTTTGAGGGACCTTG    | 113       |
|                        |                    | GCTTTGTCTGATGGCAACTG    |           |
| <i>DHAR</i>            | Solyc05g054760.2   | TGAGCTTGGCTCCAAAACCTG   | 144       |
|                        |                    | CTTCAGCCTTGGTTTTCTGG    |           |
| <i>GR_cyt</i>          | Solyc09g091840.3   | AAAGTGTGGAGCAACCAAGG    | 86        |
|                        |                    | CTGAACGCATGGTCACAAAC    |           |
| <i>GR_chl</i>          | Solyc09g065900.3   | TAGCAAAGTTCTGGGCTTGC    | 84        |
|                        |                    | AACCCTGCTTTGACTGCAAC    |           |
| <i>GSNOR</i>           | Solyc09g064370.3   | TCCATTTCAGCTGGTGACTG    | 81        |
|                        |                    | AGGGAAGGAACCTGTGATCG    |           |
| <i>SOD</i>             | Solyc02g021140.3   | GGATTGGCTTGTCTTGAGC     | 99        |
|                        |                    | CGATCAGGGGGATATCATTC    |           |
| <i>GST</i>             | Solyc01g099590.3   | TGGGCTCGTTTTGTTGATG     | 80        |
|                        |                    | CCCTCTGCTTTTGTCTCC      |           |
| <i>GST TCHQD</i>       | Solyc04g057890.3   | TTCCTGAACAGCCAGAAGG     | 138       |
|                        |                    | ACAGGAACCTTCGCACTTGG    |           |

**Supplementary Table S3.** Genes used for the bioinformatics study.

| Gene             | ID Gene          | Location                                            | Information                                               |
|------------------|------------------|-----------------------------------------------------|-----------------------------------------------------------|
| <i>APX</i>       | Solyc06g005150.3 | Chromosome 6: 170,183-173,377                       | Ascorbate peroxidase                                      |
| <i>DHAR</i>      | Solyc05g054760.2 | Chromosome 5: 65,455,922-65,460,219                 | dehydroascorbate reductase 1 dhar1                        |
| <i>GRcyt</i>     | Solyc09g091840.3 | Chromosome 9: 71,517,454-71,527,429                 | Glutathione reductase, cytosolic                          |
| <i>GRchl</i>     | Solyc09g065900.3 | Chromosome 9: 64,425,969-64,432,963                 | Glutathione reductase                                     |
| <i>GSNOR</i>     | Solyc09g064370.3 | Chromosome 9: 61,781,099-61,785,732                 | <u>GSNOR (S-(hydroxymethyl)glutathione dehydrogenase)</u> |
| <i>SOD</i>       | Solyc02g021140.3 | Chromosome 2: 22,261,065-22,263,375                 | Superoxide dismutase                                      |
| <i>GST</i>       | Solyc01g099590.3 | Chromosome 1: 89,654,694-89,655,730                 | Glutathione-S-transferase                                 |
| <i>GST TCHQD</i> | Solyc04g057890.3 | Chromosome 4: 54,949,331-54,955,349 reverse strand. | GST 2 Glutathione S-transferase TCHQD                     |
